# Supplementary material for: Clustering diurnal cycles of day-to-day temperature change to understand their impacts on air quality forecasting in mountain-basin areas
Source: Copernicus journal article supplement (doi:10.5194/acp-21-14493-2021), 2021-09-30
Supplement: Supplementary file 1 [file acp-21-14493-2021-supplement.pdf]

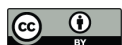

*Supplement of*

## **Clustering diurnal cycles of day-to-day temperature change to understand their impacts on air quality forecasting in mountain-basin areas**

**Debing Kong et al.**

*Correspondence to:* Guicai Ning ([ninggc09@lzu.edu.cn](mailto:ninggc09@lzu.edu.cn))

The copyright of individual parts of the supplement might differ from the article licence.

## 22 **K-means clustering**

23 K-means is one of the most commonly used unsupervised learning algorithms that treat the renowned clustering problem  
24 (MacQueen, 1967;Hartigan and Wong, 1979;Mokdad and Haddad, 2017). This is, by automatically partitioning the given  
25 data set into a certain number of groups selected a priori (assume k clusters). The aim of the K-means algorithm is to divide  
26 M points in N dimensions into K clusters so that the within-cluster sum of squares is minimized. Then, the initial cluster  
27 centers are iteratively refined as follows.

28 Each data point is assigned to its neighboring cluster centroid based on the Euclidean distance metric.

29 Each cluster centroid is then re-calculated to be the mean of its constituent data points. This can be achieved by minimizing  
30 an objective function known as a squared error function. It is defined as:

31 
$$J(v) = \sum_{i=1}^k \sum_{j=1}^{c_i} (\|x_i - v_j\|)^2$$

32 where

33  $k$ : is the number of cluster centers;

34  $c_i$ : is the number of data points in the  $i^{th}$  cluster;

35  $\|x_i - v_j\|$ : is the Euclidean distance between  $x_i$  and  $v_j$ ;

36  $v_j$ : is the data points in the  $i^{th}$  cluster;

37  $x_i$ : is the centroid vector of the  $i^{th}$  cluster.

38 When there is no further change in assignment of data point to clusters, the K-means algorithm converges to the optimal  
39 solution.

40

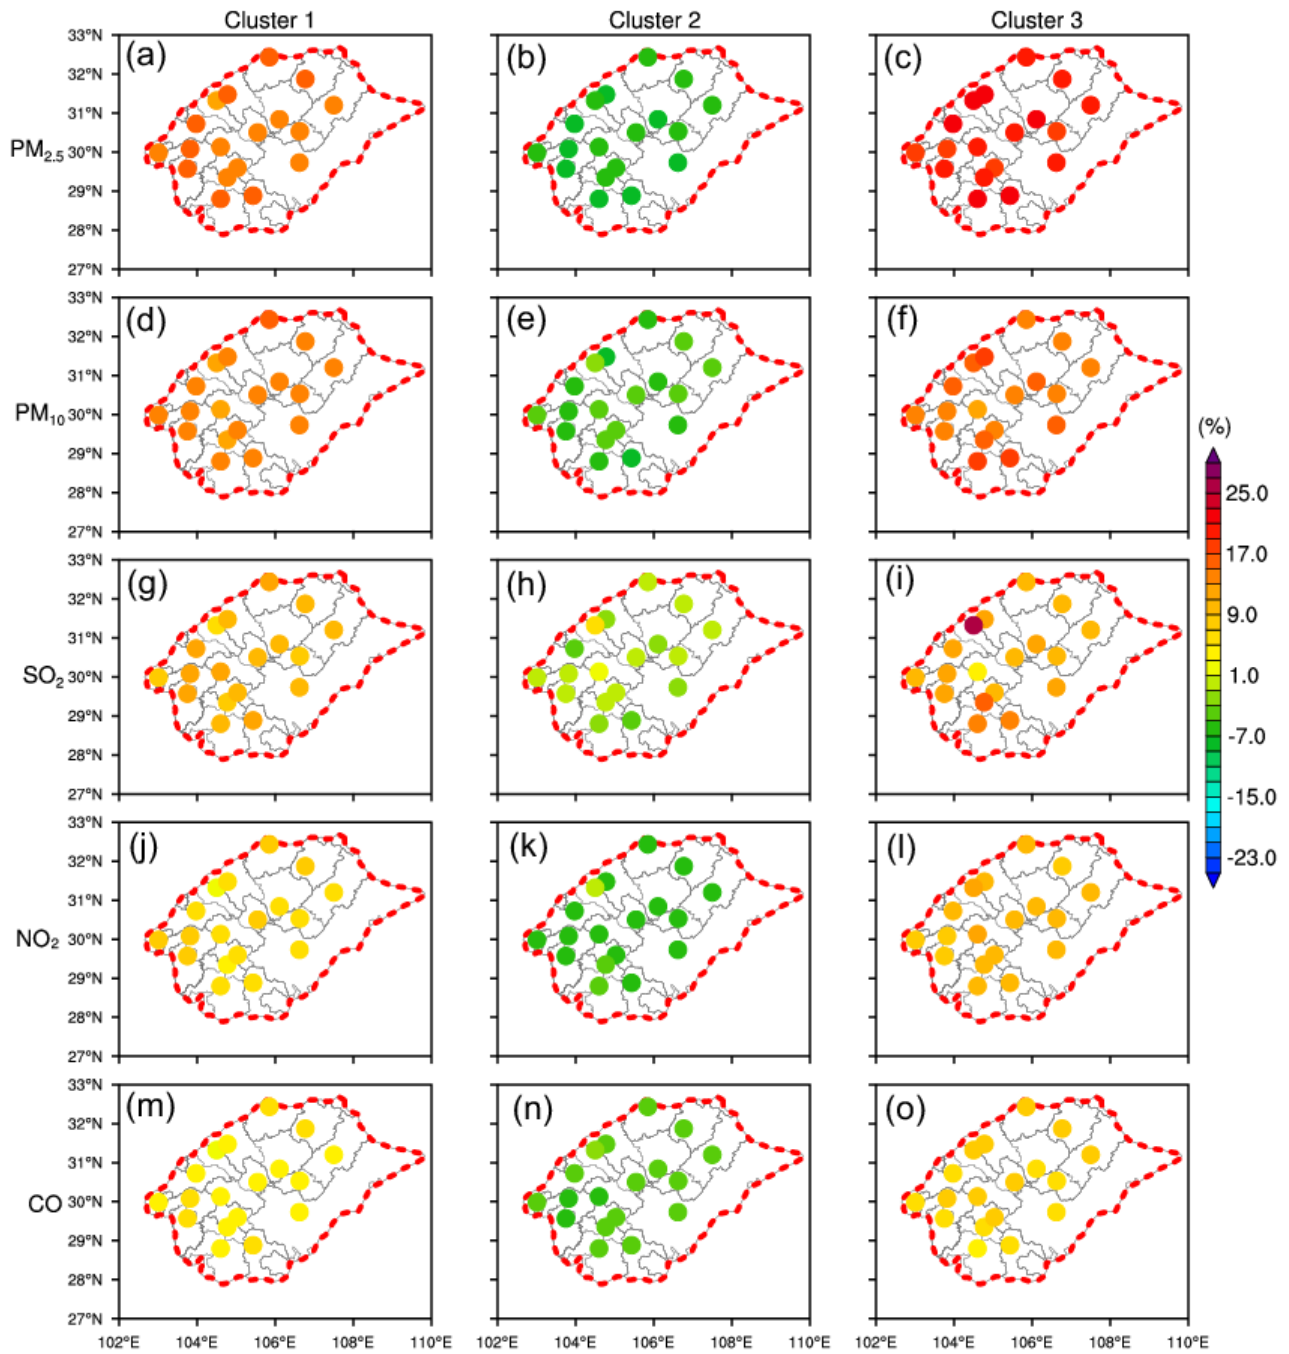

41

42 **Figure S1** Spatial distribution of percentage values of the day-to-day changes in surface PM<sub>2.5</sub> (a–c), PM<sub>10</sub> (d–f), SO<sub>2</sub> (g–i),

43 NO<sub>2</sub> (j–l), and CO (m–o) concentrations following the three identified diurnal cycles within one day.

44

45 **References**

46 Hartigan, J. A., and Wong, M. A.: Algorithm AS 136: A K-Means Clustering Algorithm, Journal of the Royal Statistical  
47 Society. Series C (Applied Statistics), 28, 100-108, doi: 10.2307/2346830, 1979.

48 MacQueen, J.: Some methods for classification and analysis of multivariate observations, Proceedings of the fifth Berkeley  
49 symposium on mathematical statistics and probability, 1967, 281-297.

50 Mokdad, F., and Haddad, B.: Improved infrared precipitation estimation approaches based on k-means clustering:  
51 application to north Algeria using MSG-SEVIRI satellite data, Adv. Space Res., 59, 2880-2900, doi:  
52 10.1016/j.asr.2017.03.027, 2017.

53
